# Supplementary material for: A remote sensing-based dataset to characterize the ecosystem functioning and functional diversity in the Biosphere Reserve of Sierra Nevada (SE Spain)
Source: Copernicus journal article supplement (doi:10.5194/essd-2021-223), 2021-09-27
Supplement: Supplementary file [file essd-2021-223-AC1-supplement.pdf]

**Response to Referee comments on “A remote sensing-based dataset to characterize the ecosystem functioning and functional diversity of a Biosphere Reserve: Sierra Nevada (SE Spain)” by Beatriz P. Cazorla et al.**

Dear referee, we really appreciate your feedback. We have made the modifications you suggest, as detailed below.

**Referee comments:**

**\*C1. - although the legend has been updated as indicated in the author's response, die figure (now) 3:still features the misleading description: Mean EVI (Area under the curve)**

R1: According to referee comments, in the final manuscript we will replace the misleading figure description EVI\_mean "area under the curve" by Mean EVI (annual mean) (Annual primary production). Please find attached the modified figure in this reply.

Best wishes,

B. Cazorla on behalf of all co-authors

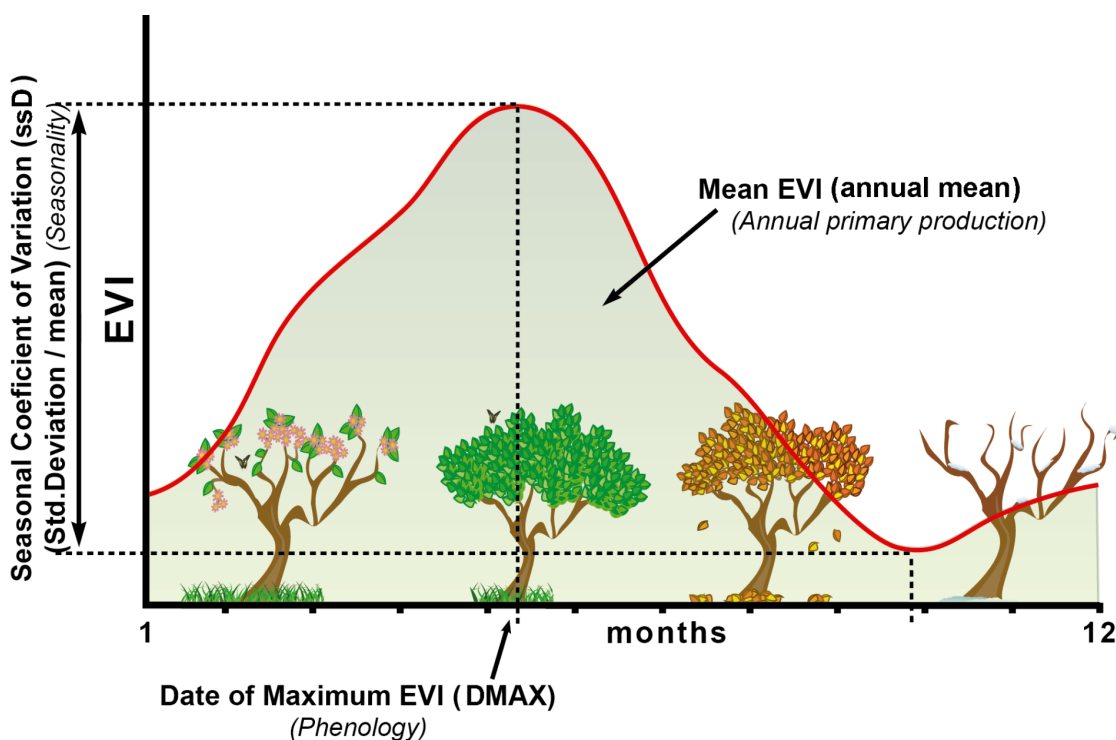

**Figure 3: Seasonal dynamics of Enhanced Vegetation Index (EVI) and EVI derived metrics or Ecosystem Functional Attributes (EFAs). The “X” axis corresponds to the months of the year and the “Y” axis to the EVI values. EFAs were: the annual mean of EVI, an estimator of annual primary production (EVI\_mean); the EVI seasonal coefficient of variation, i.e. a descriptor of seasonality or the differences between the growing and non growing seasons (EVI\_sSD), and the date of maximum EVI, a phenological indicator of the growing season (EVI\_DMAX). We chose these three EVI metrics or EFAs since they capture most of the variance (96.5%) of the EVI seasonal dynamics in a Principal Component Analysis.**
